# Supplementary material for: Altered White Matter Integrity at Illness Onset in Adolescents With a First Episode of Psychosis
Source: Frontiers journal article supplement (doi:10.3389/fpsyt.2022.876793), 2022-05-10
Supplement: Data_Sheet_1.PDF [file Data_Sheet_1.PDF]

## Supplemental material

### 1. Relationship between changes in FA and clinical variables (symptom severity, antipsychotic medication dose and lithium treatment).

We used a general linear model to assess the relationship between FA values in the right posterior cingulate and scores in the Positive And Negative Symptom Scale (PANSS) total scale ( $F=0.007$ ,  $p=0.934$ ), and the Clinical Global Impression (CGI) scale ( $F=0.06$ ,  $p=0.939$ ), and the dose of antipsychotic medication transformed into chlorpromazine equivalents ( $F=3.630$ ,  $p=0.07$ ). Similar results were found when studying the relationship between FA values in the right parahippocampal region and the PANSS total ( $F=0.515$ ,  $p=0.481$ ) and CGI ( $F=2.046$ ,  $p=0.167$ ) scores, and antipsychotic medication doses transformed into chlorpromazine equivalents ( $F=0.049$ ,  $p=0.827$ ).

Using ANOVA, we examined whether there were differences in FA values in the group of patients with first episode psychosis (FEP) according to whether they were receiving treatment with lithium ( $n=8$  receiving lithium vs  $n=18$  without). We did not find differences in the FA value in either the posterior cingulate ( $0.315 \pm 0.027$  vs.  $0.322 \pm 0.026$ ,  $F=0.41$ ,  $p=0.53$ ) or in the parahippocampal regions ( $0.271 \pm 0.007$  vs.  $0.277 \pm 0.024$ ,  $F=0.385$ ,  $p=0.541$ ).

### 2. FA group differences on the basis of cannabis use and FEP sub-diagnosis at follow up.

Using ANOVA, we examined possible group differences in DTI measures on the basis of cannabis use and FEP diagnoses at follow-up.

When comparing FEP patients according to cannabis use ( $n=10$  with versus  $n=16$  without) we did not find any differences in the FA value in either the right posterior cingulate ( $0.323 \pm 0.029$  vs.  $0.318 \pm 0.023$ ,  $F=0.273$ ,  $p=0.6$ ) or right parahippocampal region ( $0.269 \pm 0.0143$  vs.  $0.278 \pm 0.023$ ,  $F=1.419$ ,  $p=0.245$ ).

When comparing FEP patients according to diagnoses at follow-up (adolescents with schizophrenia spectrum disorder,  $n=16$  vs adolescents with bipolar disorder,  $n=10$ ), no significant differences were found in the FA value in either the right posterior cingulate ( $0.321 \pm 0.027$  vs.  $0.319 \pm 0.025$ ,  $F=0.028$ ,  $p=0.87$ ) or parahippocampal regions ( $0.276 \pm 0.025$  vs.  $0.272 \pm 0.008$ ,  $F=0.242$ ,  $p=0.627$ ).
